# Supplementary material for: MRI-detection rate and incidence of lumbar bleeding sources in 190 patients with non-aneurysmal SAH
Source: PLoS One. 2017 Apr 3;12(4):e0174734. doi: 10.1371/journal.pone.0174734 (PMC5378360; doi:10.1371/journal.pone.0174734)
Supplement: S1 Table — (XLSX) [file pone.0174734.s001.xlsx]

## Sheet: NASAH
PATSEX	PatAge	Fisher_score	spinal MRI_positive
2	50	10	0
2	65	10	0
2	75	10	0
2	55	10	0
2	61	10	1
2	45	10	0
2	49	10	0
2	64	10	0
2	59	10	0
2	64	10	0
2	38	10	1
1	63	10	0
2	60	10	0
1	82	10	0
2	57	10	0
2	59	10	0
2	38	10	0
2	33	10	0
2	51	10	0
2	23	10	0
2	50	10	0
1	43	10	0
2	33	10	0
1	61	10	0
2	42	10	0
2	88	10	0
2	54	10	0
1	50	10	0
1	40	10	0
2	50	10	0
1	79	10	0
2	52	10	0
2	47	10	0
2	59	10	0
1	55	10	0
1	36	10	0
1	43	10	0
2	78	10	0
2	63	10	0
2	46	10	0
2	79	10	0
2	66	10	0
2	54	10	0
1	57	10	0
1	56	10	0
2	78	10	0
2	34	10	0
1	55	10	0
1	34	10	0
2	60	10	0
2	72	10	0
2	60	10	0
2	45	10	0
2	44	10	0
1	55	10	0
2	43	10	0
2	42	10	0
2	48	10	0
2	51	10	0
1	48	10	0
2	60	10	0
2	57	10	0
2	43	10	0
2	39	10	0
2	51	10	0
2	58	10	0
2	38	10	0
1	62	10	0
1	57	10	0
1	47	10	0
2	63	10	0
2	39	10	0
1	29	10	0
1	57	10	0
2	56	10	0
1	49	10	0
1	53	10	0
1	50	10	0
1	44	10	0
2	37	10	0
1	41	10	0
1	39	10	0
2	35	10	0
1	40	10	0
1	45	10	0
1	25	10	0
1	21	10	0
1	87	3	0
2	70	2	0
2	61	2	0
2	77	2	0
2	71	3	0
2	61	1	0
2	31	2	0
1	60	2	0
1	47	2	0
2	72	3	0
1	60	2	0
1	59	2	0
2	54	3	0
1	73	3	0
2	58	2	0
2	62	2	0
1	55	2	0
2	71	2	0
2	70	3	0
1	47	3	0
2	49	2	0
1	70	1	0
2	74	3	0
2	24	1	0
1	53	3	0
2	47	3	0
2	83	2	0
2	44	3	0
2	65	3	0
1	71	3	0
1	70	2	0
2	50	3	0
2	52	3	0
2	65	3	0
1	48	2	0
2	43	3	0
2	23	1	0
2	65	1	0
1	58	3	0
1	44	1	0
2	59	1	0
1	69	1	0
2	50	1	0
2	53	2	0
2	44	3	0
2	75	2	0
1	61	2	0
1	52	1	0
1	60	1	0
2	63	2	0
2	74	3	0
2	83	3	0
2	80	2	0
2	60	3	0
1	77	2	0
1	70	2	0
1	35	2	0
2	17	3	0
1	63	2	0
1	25	2	0
2	62	3	0
2	74	1	0
1	65	1	0
2	35	1	0
2	69	1	0
1	81	2	0
1	76	2	0
2	61	2	0
1	64	3	0
2	55	1	0
2	84	3	0
2	59	1	0
1	66	1	0
1	64	2	0
1	21	1	0
2	65	3	0
1	79	2	0
1	62	2	0
1	62	2	0
1	78	2	0
1	68	2	0
2	59	3	0
1	51	2	0
1	89	2	0
2	57	3	0
1	61	2	0
2	34	2	0
2	71	1	0
1	53	2	0
1	64	2	0
2	66	3	0
2	58	1	0
1	44	3	0
1	78	3	0
2	52	3	0
2	33	2	0
1	68	3	0
2	69	2	0
2	47	3	0
2	24	1	1
2	37	1	1
1	76	2	0
1	80	2	0

## Sheet: CTnegative
PATSEX	PatAge	Fisher_score	spinal MRI_positive	low-back pain
2	61	1	0	0
1	70	1	0	1
2	24	1	0	0
2	23	1	0	0
2	65	1	0	1
1	44	1	0	0
2	59	1	0	0
1	69	1	0	1
2	50	1	0	0
1	52	1	0	1
1	60	1	0	1
2	74	1	0	0
1	65	1	0	1
2	35	1	0	0
2	69	1	0	0
2	55	1	0	0
2	59	1	0	0
1	66	1	0	0
1	21	1	0	0
2	71	1	0	0
2	58	1	0	0
2	24	1	1	1
2	37	1	1	1
